# Supplementary material
Source: ML conference proceedings conference paper supplement (https://www.ecva.net/papers/eccv_2022/papers_ECCV/html/136770460_ECCV_2022_paper.php)
Supplement: Supplementary file 1 [file 136770460-supp.pdf]

# Supplementary: Supervised Attribute Information Removal and Reconstruction for Image Manipulation

Nannan Li and Bryan A. Plummer

Boston University  
{nnli,bplum}@bu.edu

## 1 Proof of the Upper Bound for Mutual Information

In Eq. (2) of the paper, we claimed that the mutual information between the source attributes  $\mathbf{a}_i$  and the attribute excluded features  $R(E_1(I_{cl}))$  is upper bounded by the maximum log probability in the attribute distribution. We prove this claim in the following.

Let  $\text{MI}(\mathbf{a}_i, R(E_1(I_{cl})))$  denote the mutual information. Replacing  $R(E_1(I_{cl}))$  with  $r$  for convenience gives

$$\begin{aligned} \text{MI}(\mathbf{a}_i, r) &= \sum_r \sum_{\mathbf{a}_i} p(\mathbf{a}_i, r) \log \frac{p(\mathbf{a}_i, r)}{p(\mathbf{a}_i)p(r)} \\ &= \sum_r \sum_{\mathbf{a}_i} p(\mathbf{a}_i, r) \log \frac{p(\mathbf{a}_i|r)}{p(\mathbf{a}_i)} \\ &= \sum_r \sum_{\mathbf{a}_i} p(\mathbf{a}_i, r) [\log p(\mathbf{a}_i|r) - \log p(\mathbf{a}_i)] \end{aligned} \quad (15)$$

Since the number of attribute values in  $\mathbf{a}_i$  is finite,  $-\log p(\mathbf{a}_i)$  can be upper bounded by a constant  $c, c > 0$ :

$$\begin{aligned} \text{MI}(\mathbf{a}_i, r) &\leq \sum_r \sum_{\mathbf{a}_i} p(\mathbf{a}_i, r) \log p(\mathbf{a}_i|r) + c \sum_r \sum_{\mathbf{a}_i} p(\mathbf{a}_i, r) \\ &= \sum_r \sum_{\mathbf{a}_i} p(\mathbf{a}_i, r) \log p(\mathbf{a}_i|r) + c \end{aligned} \quad (16)$$

In the r.h.s., we can continue upper bounding  $p(\mathbf{a}_i|r)$  with the maximum probability in the distribution to make it independent of  $\mathbf{a}_i$ :

$$\begin{aligned} \text{MI}(\mathbf{a}_i, r) &\leq \sum_r \max_{\mathbf{a}_i} \log p(\mathbf{a}_i|r) \sum_{\mathbf{a}_i} p(\mathbf{a}_i, r) + c \\ &= \sum_r p(r) \max_{\mathbf{a}_i} \log p(\mathbf{a}_i|r) + c \\ &= \mathbb{E}_{r \sim p(r)} [\max_{\mathbf{a}_i} \log p(\mathbf{a}_i|r)] + c, \end{aligned} \quad (17)$$

where  $c$  is a constant. Note that we can not minimize the mutual information itself because the joint distribution  $p(\mathbf{a}_i, r)$  is intractable. The tightness of this upper bound depends on the distribution  $p(\mathbf{a}_i)$  and  $p(\mathbf{a}_i|r)$ . More specifically,

larger  $\min_{\mathbf{a}_i} p(\mathbf{a}_i)$  gives smaller constant  $c$ , and smaller  $\max_{\mathbf{a}_i} p(\mathbf{a}_i|r)$  reduces the gap. The equality is reached when  $p(\mathbf{a}_i|r)$  is an uniform distribution.

To conclude, using an attribute classifier to estimate the above conditional probability  $p(a_i|r)$ , we prove that the upper bound is the maximum log probability in the attribute distribution as in Eq. (2).

## 2 Ablations on Hyperparameters

In Figure 1, we provide the experimental results for setting different values of the hyperparameters in Eq. (13) and (14) on CelebA.  $\lambda_1$  to  $\lambda_4$  denotes the trade-off parameter for disentanglement, image attribute prediction, image reconstruction and perceptual loss, respectively. Figure 1a shows the manipulation accuracy, top-5 retrieval and top-20 retrieval rates for each parameter. The reconstruction error has a different unit of measurement, for which we show its corresponding graph in Figure 1b. It can be noticed that increasing the weight (*i.e.*,  $\lambda_2$ ) for the image attribute loss improves the manipulation accuracy, whereas it can hurt the reconstruction performance. This indicates a trade-off between successful manipulation and qualitative reconstruction. In the paper, we chose the values of each trade-off parameter for a balance between these two aspects.

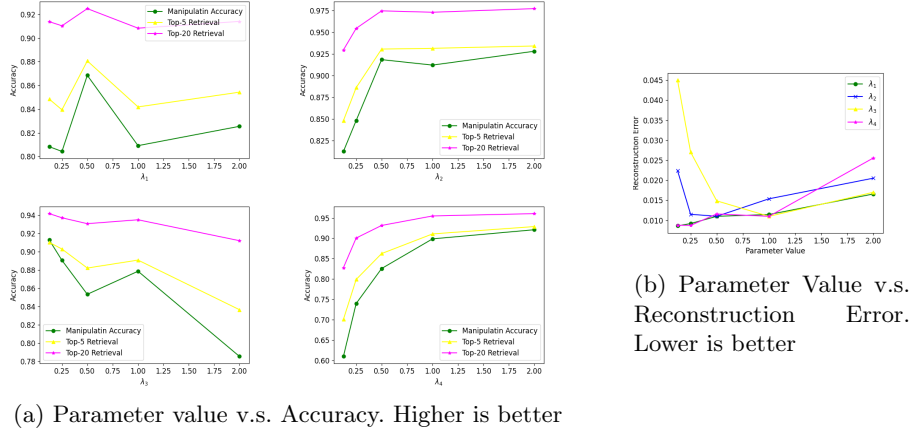

Fig. 1: Results on using different values of the hyperparameters.  $\lambda_1$  to  $\lambda_4$  denotes the trade-off parameters for disentanglement, image attribute prediction, image reconstruction and perceptual loss, respectively

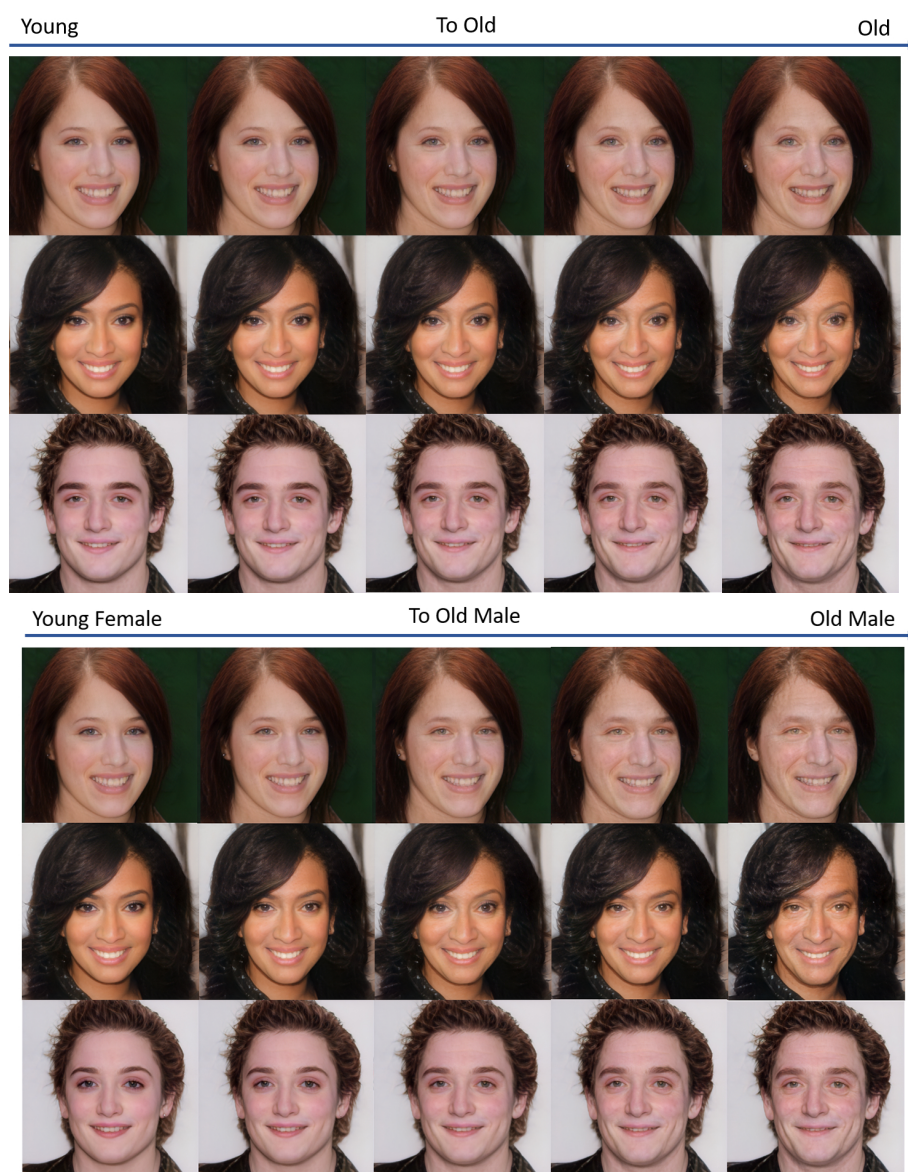

Fig. 2: Additional examples on manipulating the attribute strength
